24           **How do gender norms contribute to stunting in Ntchisi District, Malawi? A qualitative study**

25           **Abstract**

26           **Background and Aim:** Despite adequate food production and nutrition intervention coverage,  
27           stunting remains an enduring problem in Ntchisi, Malawi. Globally, gender and social norms are known  
28           to influence nutritional outcomes in children. This study explores how gender norms contribute to  
29           child stunting, in Ntchisi district, Central Malawi.

30           **Research Methods:** Informed by the UNICEF Framework for Malnutrition, nine focus group  
31           discussions were conducted with mothers (n=24), fathers (n=23), and members of policy and health  
32           treatment committees (n=21), spanning three different areas of Ntchisi district. Data were analysed  
33           through inductive thematic analysis, guided by the framework for Research in Gender and Ethics  
34           (RinGs).

35           **Results:** Three primary themes were identified: 1) gender unequal decision making on the  
36           consumption, sale and distribution of food; 2) enshrined community norms influence feeding practices  
37           underpinned by gender-based violence; and 3) policy disconnections and gaps that reinforce gender  
38           norms regarding nutrition. Themes encompassed practices across household, health treatment, and  
39           policy level.

40           **Conclusion:** Gender norms that underpin inequalities in decision making for production and  
41           consumption of food undermine children’s nourishment and contributes towards sustained child  
42           malnutrition in Ntchisi. Existing policy documents should revise their guidelines to incorporate gender  
43           norms as key determinants of malnutrition.

44           **Keywords:**       Stunting, Gender Norms, Malnutrition, Malawi, Children, UNICEF Conceptual  
45           Framework for Malnutrition

46 **How do gender norms contribute to stunting in Ntchisi District, Malawi? A qualitative study**

47 **Introduction**

48 Defined by the World Health Organization (WHO) as “deficiencies, excesses or imbalances in a  
49 person’s intake of energy and/or nutrients”(1) the concept of malnutrition incorporates under-  
50 nutrition, micro-nutrient related malnutrition, and over-nutrition. Malnutrition remains a topic of  
51 global concern, with 20% of the global under-five population (149.2 million) currently ‘stunted,’ that  
52 is, a low height-for-age index,(2) and where malnutrition accounts for 53% of under-5 mortality.(3)  
53 Stunting causes long-term impairment including poor school performance in childhood, reduced  
54 productivity later in life, and an increased risk of chronic non-communicable illnesses; and, in the  
55 worst cases, death.(4)

56 Numerous international policy commitments seek to address malnutrition. The United Nations  
57 (UN) Sustainable Development Goals (SDGs), particularly SDG2, aspire to improve agriculture and food  
58 systems to feed and nourish malnourished populations.(5) Likewise, the WHO’s 2018 Global Nutrition  
59 Target (GNT) sought to reduce the number of stunted children by 40%(6) and the UN’s 2015 General  
60 Assembly declared 2015-2025 to be the decade of nutrition, a commitment by member states to  
61 implement policies, programs, and investments to eliminate malnutrition in all its forms. Scaling Up  
62 Nutrition (SUN) – a global movement working with the UN, civil society, business and donor networks  
63 to tackle malnutrition - promotes exclusive care and investment in child care globally, particularly in  
64 the first 1000 days of life.(7)

65 Established determinants of malnutrition include poor maternal nutrition and young child  
66 feeding practices;(8, 9) young mothers’ age at first birth, which is linked to higher parity and poorer  
67 birth spacing practices;(10) depleted nutrition for mothers experiencing successive pregnancies and  
68 lactation,(8) associated with poorer feeding practices;(11) subclinical infections from exposures to  
69 contaminated environments;(12),(13) and infectious diseases such as malaria, which can compound

70 short term loss of weight and contribute to long term stunting.(14) Malnutrition is thus determined  
71 by the complex interaction of multiple social, economic, and cultural factors. These factors are  
72 reflected in UNICEF’s Conceptual Framework of Maternal and Child Nutrition (Figure 1),(15) often  
73 considered the primary global policy instrument to address the causes and consequences of  
74 malnutrition and reduce its prevalence.(16) According to this framework, *basic-level* causes operate  
75 in the broader context and include socio-economic and cultural context, human capital, and access to  
76 potential resources; *underlying* causes operate at household and community level, including care and  
77 feeding practices; and *immediate* causes relate to direct diet intake and the presence of disease.(16)  
78 Recently updated in 2020, the framework now also recognizes contributors to good nutrition as being  
79 either immediate, underlying, or enabling determinants.(17)

#### 80 **Figure 1: UNICEF Framework for Malnutrition**

81 [INSERT FIGURE ONE HERE]

82  
83 Gender refers to the socially constructed roles, behaviors, activities, and attributes that a given  
84 society considers appropriate for men and women.(18) More recently, growing attention has been  
85 brought to the impact of gender norms on child malnutrition and stunting.(19) In many settings,  
86 women still cannot exercise freedom and autonomy of choice, including within their own  
87 households,(14) with the extent to which a mother can make independent decisions negatively  
88 associated with the likelihood of childhood stunting.(19) Similarly, granting women greater decision-  
89 making power is associated with notable improvements in their children’s height-for-age index.(20)  
90 Likewise, analysis of gender relations in norms and decision-making has recently come to the fore in  
91 explaining the endurance of problematic health outcomes.(21) Indeed, positive social and cultural  
92 norms (which include gender) are recognized as one of the most enabling determinants of improved  
93 nutrition for women and children.(17)

94 In recognition of the role of gender and social norms in determining nutritional outcomes in  
95 children, several frameworks have been created to guide gender analyses within health and nutritional  
96 programming,(22-24) which differ in their focus on types of power or area of the health system.  
97 Specifically, the Research in Gender and Ethics (RinGS) Framework articulates gender differences as  
98 unfolding across four domains: access to resources; division of labour, roles, and everyday practices;  
99 social norms and values; and rules and decision making.(25, 26) It is considered comprehensive for  
100 examining social and structural elements of gender interacting with health.(21)

### 101 **Malnutrition in Malawi**

102 Categorized as one of the poorest countries in the world by the World Bank,(27) Malawi is a Southern  
103 African country home to over 18 million inhabitants. A signatory to the SUN movement since 2011,  
104 the Malawian Government applies UNICEF's Conceptual Framework for Malnutrition (1990) to  
105 address malnutrition.(16) Moreover, the Malawi Multi-Sectoral National Nutrition Policy (MSNNP)  
106 sets out the country's priority areas for implementing nutrition interventions across the country.(28)  
107 Specifically, these priority areas include (i) the prevention of under-nutrition, (ii) achieving gender  
108 equality, equity protection, participation and empowerment, and (iii) the treatment and control of  
109 malnutrition.(28) The MSNNP outlines best practices to end malnutrition, detailing policy and  
110 implementation plans to address causes of malnutrition at household, health treatment, and policy  
111 levels.(28)

112 While reduced from 47% in 2010,(29) the prevalence of stunting in children under-five years in  
113 Malawi remains a worrying 37% in 2015, the most recent available data. Among one of the most poorly  
114 affected districts in the country is Ntchisi, where 40% of the population are malnourished.(29)  
115 Paradoxically, Ntchisi is also considered one of the most household food secure districts in the  
116 country.(30, 31) Being food secure defined as people having at all times physical, social and economic  
117 access to food, safely consumed in sufficient quantity and quality for dietary needs and food  
118 preferences, supported by an environment of adequate water and sanitation, health services and

119 care.(32, 33) Furthermore, exclusive breastfeeding rates in Ntchisi district for infants under six months  
120 (61%) exceed the global average (40%).(29)(2)

121 Evidence suggests that gender norms may play a role in Ntchisi's observed malnutrition rates.  
122 For example, in 2016, 47% of women were married before 18 years and 29% of adolescent girls were  
123 mothers.(29, 34) Women were also found to be five times less likely to make independent decisions  
124 when compared with men, a difference linked to variation in earning power.(35) There is evidence  
125 that differences in gender norms have a detrimental impact on women's health.(36) *How* differences  
126 in gender norms may contribute to malnourishment and stunting in children, in Ntchisi, Malawi,  
127 however, remain unexplored. This study therefore aimed to explore how gender norms play a role in  
128 continued stunting in Ntchisi District, Malawi, and to contribute to a revised version of the UNICEF  
129 Framework for Malnutrition to better reflect gender norms.

130

## 131 **Materials and Methods**

### 132 *Design and Sampling*

133 We employed a qualitative design, as part of a wider examination of the causes of observed stunting  
134 in Ntchisi district. In February and March 2019, we conducted nine focus group discussions (FGDs) to  
135 explore the role of gender norms in persistent child stunting across three different communities. FGDs  
136 were selected as they are considered valuable for generating data on group social norms, while also  
137 prioritising participants' perspectives.(37) Each community was purposely selected to achieve  
138 geographical spread. Six FGDs - two in each community - were conducted with mothers and fathers  
139 as household members, one FGD was conducted with participants delivering nutrition health  
140 treatment and two were conducted with participants working on nutrition policy. Therefore, nine  
141 focus groups explored how gender norms might impact (mal)nutrition, reflecting household, health  
142 treatment and nutrition policy spheres as articulated in the Malawi MSNNP.(28)

143 In total, 68 participants were recruited, with 6-9 people represented within each FGD. The six  
144 FGDs with household members comprised three with males (n=24) and three with females (n=23).  
145 Females were within the reproductive age group, had at least one child under the age of five in the  
146 household, and were recruited through Growth Monitoring Sessions. There was no age limitation for  
147 males, who were also required to have at least one child under the age of five in the household. Men  
148 were recruited from nearby social gathering venues, mostly at church choir gatherings and market  
149 points via word-of-mouth by the government extension workers.

150 At health treatment level, participants (n=10) included five females and five males of the  
151 Nutrition Rehabilitation Unit (NRU) Management Committee. This committee comprises nutritionist,  
152 nurse, and home-help workers providing treatment to severe cases of malnutrition admitted to the  
153 District Health Office. Policy level participants (n=10) also comprised five females and five males of  
154 the District Agriculture Coordinating Committee (DAECC), a committee that oversees and coordinates  
155 all agricultural interventions at the district level, and the District Nutrition Coordinating Committee  
156 (DNCC), a committee responsible for coordinating all nutrition interventions at the district.

157

#### 158 Data Collection Instruments

159 Semi-structured focus group discussion guides were developed with reference to the domains of the  
160 UNICEF Framework of Malnutrition(16, 17), incorporating probes to ensure maximum investigation of  
161 persistent stunting. The guides included general questions about daily activities, food and income;  
162 resources and decision-making; and understanding of and perspectives on stunting. Discussions were  
163 conducted by the first author in Chichewa, the local language. Two field assistants, one from the health  
164 sector and the other from the agriculture sector, took notes of the participants' answers throughout  
165 the discussions as a backup for the audio recordings.

166

167 Data Management and Analysis

168 FGDs were recorded, transcribed verbatim,(38) and translated from Chichewa to English with close  
169 reference to audio files and notes. All personal identifiers were removed with all transcripts  
170 anonymized. Following a thorough review of the transcripts for familiarity, analysis comprised three  
171 phases of open (i.e. inductive) coding, categorization, and abstraction. Transcripts were coded  
172 according to the steps of Braun and Clarke(39), with common phrases assigned codes, then inductively  
173 organized into categories and themes. A framework for gender analysis,(25, 26) informed by Research  
174 in Gender and Ethics (RinGs)(22) guided analytic insights. Interpretation of the data was enhanced by  
175 discussions between the first author, the field workers, and the last author to refine analytical  
176 development and verify the conceptual coherence of the codes. All authors reviewed the categories  
177 and themes.

178

179 Ethics, Validity and Reliability

180 Ethics approval was granted by the Trinity Health Policy and Management, Centre for Global Health  
181 (HP&M/CGH) Research Ethics Committee (REC) and by the Ntchisi District Council Secretariat,  
182 including the District Health Office (DHO) and the District Agriculture Office (DAO). Informed verbal  
183 consent was sought from participants, who were fully briefed about the study aims and objectives.  
184 Verbal consent was favoured to avoid embarrassment for those who could not write, as literacy levels  
185 could not be established at the start of the interviews. Verbal consent was witnessed by the group  
186 and field workers. At all times, participants were assured of the voluntary nature of their participation,  
187 and that they could withdraw at any point in time without penalty.

188 The validity and reliability of the data was ensured through transcription, clear and transparent  
189 coding, reflexivity, and cross-checking of themes between the lead author, the last author, and two  
190 field assistants.(40) The second and third author validated the coherence of the thematic categories.



191 The first author, who carried out the data collection, is a nutritionist in Ntchisi District, and reflexive  
192 attention was paid to the influence of her positionality throughout the data collection and analysis  
193 phases.

194

195

196 **Results:**

197 **Participant Characteristics**

198 Participant mothers had a mean age of 26 while fathers had a mean age of 38. Participants reported  
199 having five children, on average. Most mothers and fathers were educated to primary level only, with  
200 some to second level. Agriculture was their main source of food and income. Among committee  
201 members, half were employed by government while the other half were employed by non-  
202 government organizations.

203 **Exploring the Role of Gender Norms in Contributing to Malnutrition**

204 Three core themes were identified in the data to illuminate the role of gender norms in contributing  
205 to malnutrition and stunting in Ntchisi. These were: (i) gender unequal decision making on the  
206 consumption, sale and distribution of food; (ii) enshrined community norms influence feeding  
207 practices, underpinned by gender based violence; (iii) policy disconnections and gaps that reinforce  
208 unequal gender norms regarding nutrition. Themes are presented in Figure 2, aligned to the RinGS  
209 Framework for Gender Analysis.(21, 22)

210

211 **Figure 2: Gender Norms Contributing to Stunting in Ntchisi District, Malawi**

212

[INSERT FIGURE TWO HERE]

213 **Gender Unequal Decision Making Shapes the Household Production and Consumption of Food**

214 Power differences between fathers and mothers affected decisions about how farm produce is  
215 utilized. The policy level focus groups explained how practices in subsistence agriculture affect what  
216 to produce, the quantity to produce, and where to sell produce, all of which affect how much remains  
217 for families to eat. Women in the district were reported to have lower decision-making power about  
218 food production by comparison to men:

219 “Men dominate...they control what is cultivated and what to do with the produce. You find that  
220 a woman might know that legumes are nutritious and essential for child growth... [but] when  
221 the husband wants to sell, the [wife] will not resist.” DAECC FGD.

222 Describing their social context, household participants told of the different roles that mothers and  
223 fathers take and how this impacts children’s nutrition. The participants recounted that within the  
224 household, fathers are considered providers while mothers are nurturers. When describing their daily  
225 routine, mothers mentioned household chores like cooking, feeding, laundry, tidying the house, and  
226 collecting firewood and water, the latter usually from a great distance. On the other hand, fathers  
227 reported daily work of gardening, casual tasks, socializing, and sourcing income for the household.  
228 Fathers and mothers emphasised a clear distinction of roles in feeding children:

229 “Men search for food...we stay at home taking care of the children... cooking for and feeding  
230 them. When men bring food, we cook.” Mothers FGD

231 “We take care of children in the sense that we search for food so that woman can cook it for  
232 the children.” Fathers FGD.

233 However, fathers were characterized by participants as not health or nutrition minded in relation to  
234 expenditure. Almost all mothers’ groups described that men in the community use their income on  
235 pleasures rather than on actual needs.

236 “Sometimes, you can work hard to produce more. However, when you harvest and sell, the man  
237 will spend it on drinking and other women. You cannot question how they spend it. They forget  
238 about their own children. You face it all because the children usually stay at home with a  
239 mother”. Mothers FGD.

240 Similarly, fathers indicated that when they harvest, they have several responsibilities to address.  
241 Nutrition might not usually be the priority.

242 “A poor person always has a handful of things to take care of. When you get money...you don’t  
243 remember what nutrition or nutritious food is about” Fathers FGD.

244 Differences between mothers and fathers in decision making about utilization of farm produce also  
245 manifested at the health center. The health committee FGD recounted how in-patient cases of  
246 malnutrition at the health centre are presented mostly by mothers, who attend with their children  
247 while fathers stay at home. Extended stays can cause worry to mothers about further disruption to  
248 home life and the oversale of food:

249 “The mothers wait for children here...we give them health talks every morning. Fathers usually  
250 stay at home...[but]...when the mothers stay for some days, they start complaining thinking that  
251 their husbands will marry another woman or get a chance to sell out farm produce and other  
252 household assets. They just become so eager to go, and it is evident in how they act.” NRU FGD.

253 Although mothers in Ntchisi were primarily responsible for feeding children, they lacked decision-  
254 making power over the production and consumption of food. Fathers, who held decision making  
255 power, were not oriented towards nutritional needs for children. Furthermore, inequality in decision  
256 making about food for children intensifies when women are not present.

257

258 **Enshrined Community Norms Influence Feeding Practices, Underpinned by Gender Based Violence**

259 Household focus groups reported that inequity in household decision making around food was  
260 preserved by traditional norms of gender-based violence (GBV) in Ntchisi district. A clear and strong  
261 description by participants was that women cooperate with men’s decisions for fear of GBV, and do  
262 not speak out about GBV in fear of shaming their husbands and losing respect.

263 “In this area, when a woman has a brilliant idea, men do not want to appear cheap, so they do  
264 not agree, whatever it is about...as a woman you just coil up and keep quiet otherwise you will  
265 be beaten” Mothers FGDs

266 The supremacy of this social norm was bolstered by the status it confers on men in the community.

267 “Men here say things, and that is final...maybe it could be one out of ten men that would be  
268 under petticoat government. If you allow your wife to be key in making decisions, your friends  
269 will despise you...even young children would look down on you.” Fathers FGD.

270 District committee members recounted that cases of GBV are more prevalent at times of the year  
271 when produce is sold. Gaps in power between mothers and fathers extended to a firm inequality in  
272 autonomy, which impacted on children’s nutrition.

273 “Men are just bad. During the cultivating period, they work well with their wives, but when it is  
274 selling time, they prefer to work alone and spend the money on drinking or other women...this  
275 initiates conflicts that usually ends in abuse. Children are usually left with mothers that do not  
276 have food supplies or money.” DNCC FGD.

277 Mothers and fathers highlighted that the clusters of friends and neighbours they lived among were  
278 their primary sources of knowledge, indicating the strong traditional norms shaped how children were  
279 taken care of. Gender based violent practices were encased in traditional community norms.

280 “Everybody does that...that’s how we do things here. Our parents teach us what they did so that  
281 we grew up. When your child is born, they take you aside and teach you many things ....we  
282 apply that so that our children grow up too” Fathers FGD.

283 Thus, community adherence to traditional practice creates a challenge to do things differently  
284 when feeding children. Rigid social norms of women required to be deferential to men were held in  
285 place by traditional expectations and the threat of gender-based violence. These norms retained an  
286 enduring social power in the community and impacted practices and decision making around food for  
287 children.

288

### 289 **Policy Disconnections and Gaps that Structurally Reinforce Gender Norms Regarding Nutrition**

290 A disconnection between production and nutrition interventions was articulated by policy level  
291 participants, with agricultural produce sold by subsistence farmers rather than retained for their  
292 families. Participants explained that while the agriculture committee incorporates nutrition  
293 interventions to its activities in theory; no nutrition achievements could be attributed to this work.

294 “We try to incorporate nutrition in our planning, but all detailed plans and achievements are  
295 with the DNCC because we mainly focus on agriculture ... however, nutrition is for DNCC, so  
296 consult them for specific achievements.” DAECC FGD.

297 The disconnection indicates a wider aspect of the gender gap because agriculture interventions -  
298 usually organized by men in the district - are implemented separately from general nutrition  
299 interventions, targeting women as primary caregivers for children.

300 Men’s participation in the implementation of nutrition interventions was noted as a gap by  
301 household level participants. Mothers encouraged targeting fathers for inclusion, highlighting that if  
302 men were aware of nutrition issues, they would be more supportive at home and more informed  
303 about nutrition-related decisions.

304 “Men should be taught. They are stubborn and irresponsible because they do not know and  
305 understand. They should hear for themselves. They should be included in care groups. Now care  
306 groups are only full of women” Mothers FGD

307           Despite father’s lack of involvement in nutrition reflecting the socio-cultural norms in Ntchisi,  
308 men in the fathers’ focus groups indicated their willingness to participate in the sessions and learn  
309 more about nutrition.

310           “The extension workers always teach women. The next training, please include us...we will come  
311 and are happy to learn.” Fathers FGD

312           Impacts of trainings were also affected by education levels, specifically literacy, of the  
313 population. Low levels of education were reported as a general feature of the population in Ntchisi,  
314 affecting practices towards childcare. Health treatment level participants highlighted how literacy  
315 levels affect the uptake of trainings.

316           “You can have a hospital, offer training in all these things...however, without school, it is all in  
317 vain. You need some [education] to understand the importance of it all.” NRU FGD.

318           The Government’s role was further emphasized in reducing teen pregnancies and achievements  
319 in nutrition education. Teen mothers face challenges in adequately nourishing themselves and their  
320 children. Pressure is exacerbated when women have their first child at a young age, because it leads  
321 to larger family size. Care demands of young children cannot be met if the mother has many children,  
322 closely spaced together.

323           “I think the issue is that people have many children. You see some have eight, others nine. They  
324 cannot afford to monitor if all ate or not. You would not know that one missed food because  
325 they are too many...[...]... the Government should do more in reducing teen pregnancies...and  
326 should invest in keeping girls in school.” NRU FGD.

327           Low levels of education undermine the household’s ability to meet the nutrition needs of children,  
328 affecting both choices in health and well-being and the priority given to well-being. These trends are  
329 also an indication of a broader structural context with unequal gender norms impacting women and  
330 children.

## 331 Discussion and Conclusion

332 Despite a context of food security, interventions on nutritious feeding, and the development of  
333 policies to target the eradication of undernutrition, children’s inadequate consumption of food in  
334 Ntchisi is impacted by gendered practices and power dynamics. Specifically, differing roles between  
335 men and women shape use of farm produce and feeding practices, enduring traditional social norms  
336 preserved via the threat of gender-based violence and structurally bolstered through policy  
337 disconnections, are all experienced as gender-related factors that impact on the nutrition of children  
338 in Ntchisi.

339 Similar to Alemayehu et al.(14), and Kamiya et al.(41), women interviewed in Ntchisi district also  
340 had limited power in making decisions about use of food within their households. Adhering to men’s  
341 decisions regarding food production is a strong tradition that results in households being unable to  
342 consume the right varieties and quantities. Although subsistence farming is generally characterized by  
343 the consumption of produce,(42) the narratives in this study highlighted how food produced for  
344 subsistence is sold and distributed rather than consumed. Subsistence farming also connotes  
345 adherence to indigenous knowledge and traditions in production and consumption, pointing again to  
346 the embedded nature of traditional practices.(43)

347 Power differences between women and men were also evident in that women were involved  
348 in harvesting food, but excluded from decisions on the use of the harvest. Conflict related to decisions  
349 on use of harvest produce reportedly resulted in increased gender-based violence or a rupture in the  
350 marriage, as participants recounted risks of both increased violence and fathers sometimes  
351 abandoning their families. This trend has been identified elsewhere, where women characterized  
352 themselves as ‘harvest wives’ in cases where their husbands abandoned them when the harvest was  
353 complete.(44) A salient phenomenon that impacts the use of food is women’s lack of inclusion in  
354 decisions on how harvested food will be used for the family, with a heightened risk of gender based  
355 violence or relationship breakdown at this point.

356 While the government has an established role in imparting knowledge on food preparation and  
357 feeding, enshrined gender norms undermine how women can practice their learning, as they are  
358 pressured to adhere to men’s decisions. Women’s translation of their nutrition knowledge into  
359 practice is also challenged by the high number of GBV cases reported in the district, more prevalent  
360 during harvest time, also contributing to the limited contribution of agricultural produce to  
361 nourishment of children. Consistent with previous findings, children’s dietary intake in Ntchisi is also  
362 reportedly further compromised by mothers’ young age and a large number of children, with  
363 consequent reduced care practices.(45) In the context where women do not make independent  
364 decisions, it can be assessed that the lack of independence extends to decisions on family size and  
365 birth control methods.

366 Father’s lack of involvement within Ntchisi was also found to be a manifestation of the social  
367 cultural norms in the district. Participants across the sample suggested inclusion of men in community  
368 trainings on infant and young child feeding. In a social context where fathers want to be respected for  
369 not being “under petticoat government”, the cultural change required to incorporate men into  
370 nutrition interventions is evident. A more targeted approach to addressing men’s roles in nutrition,  
371 that takes account of the bearing of gender norms, is required.

372 In support of the UNICEF Conceptual Framework of Malnutrition, the findings from this study  
373 demonstrate that gender dynamics indeed shape malnutrition across all three causes of malnutrition  
374 articulated in the framework - basic, underlying, and intermediate. Practices at the underlying levels  
375 of household and community related to the production and consumption of food were highly unequal  
376 for men and women. At the basic level of socio-economic and cultural context, capital, and access to  
377 resources, powerful norms bolstering inequity between women and men were evident. Unequal  
378 practices within these domains were highly gendered, intersecting to shape lack of access to and use  
379 of resources for the nourishment of children. These findings and considerations are presented in



380 Figure Three as an expanded version of the UNICEF Conceptual Framework for Maternal and Child  
381 Malnutrition.

382 **Figure 3: Factors Contributing to Stunting adapted to the 1990 UNICEF Conceptual Framework of**  
383 **Malnutrition**

384 [INSERT FIGURE 3 HERE]

385 The current study adds to the existing literature by illustrating that in Ntchisi, gender norms  
386 manifest across basic, underlying, and intermediate levels, and not just at the basic level as currently  
387 articulated within the UNICEF conceptualization. Accordingly, gender should be articulated across the  
388 entire UNICEF framework, and the framework might benefit from applying the WHO's  
389 recommendations for incorporating intersectional gender analysis.(25, 26) In line with the domains  
390 within RiNGs framework, domains of 'access to resources'; 'divisions of labour, roles and everyday  
391 practices'; 'social norms and values'; 'rules and decision making'(26) should also be incorporated into  
392 the UNICEF framework to illuminate how unequal gender norms and roles unfold to explain continued  
393 problems of nutrition for children.

394 The lack of policy coordination between agriculture and nutrition could contribute to  
395 explanations of the disconnection between food production, food consumption, and nutrition status  
396 in Ntchisi. Strengthening policy linkages between these domains would align with the 2017 Global  
397 Nutrition Report(46) statement that achieving good nutrition means practicing agriculture that feeds  
398 and nourishes a nation state. The Food and Agriculture Organization emphasizes the importance of  
399 integrating food production and nutrition interventions in parallel, and the findings presented here  
400 provide insights for practical implementation.(47, 48) Integrating nutrition and agriculture is  
401 emphasized by the theme of the 2016 World Food Day (WFD) commemorations; "our health is not  
402 only what we eat, it is primarily what we grow".(49) Gender sensitivity must traverse these  
403 connections. Male involvement in these connections is imperative, in recognition of the fact that they

404 hold decision making power and asset ownership. Mkandawire & Hendricks (2015) note that while it  
405 is important to target women and children in nutrition interventions, the exclusion of men ignores the  
406 fact that women are limited in terms of decision making powers and asset ownership.(50)

407 Taken together, our findings demonstrate how (mal)nutrition is impacted by the socially  
408 constructed roles, behaviours, activities and attributes that a given society considers appropriate for  
409 men and women, which can manifest as unequal power relations shaping access to and use of  
410 food.(26) The Malawi MSNNP cites gender equality, equity protection, participation and  
411 empowerment(28) as its second priority area. The findings can be translated into policy actions on  
412 under-nutrition and stunting under the umbrella of the MSNNP. Specifically, it is recommended that  
413 government and development partners continue multi-sectoral implementation but put special focus  
414 on male involvement.

415 The Malawi MSNNP 2018-2022 emphasizes the need to involve all line ministries and  
416 stakeholders in reducing child under-nutrition. In line with the policy objectives, this study  
417 recommends that Government and other NGOs connect programmes across household, health  
418 treatment and policy levels in Ntchisi; connect agriculture and nutrition policies; and incorporate a  
419 gender lens. In addition, education must underpin all interventions, especially so for girls experiencing  
420 teen pregnancy. The successful implementation of nutrition programmes relies on an educated and  
421 literate population.

## 422 **Limitations**

423 The research had several limitations. Firstly, interviews were conducted in Chichewa, the vernacular  
424 language in Ntchisi, and transcripts were translated to English by the first author who speaks Chichewa  
425 and English fluently. This translation process, however, might have introduced some mis-explanations  
426 of meanings of terms. Second, the first author is a nutrition officer who works in the area under study.  
427 While every effort was made to account for the researcher role, it is challenging to fully eliminate a

428 researchers' influence on participant responses. In this case, the researcher's gender or role as a  
429 nutritionist may have influenced the discussions. Thirdly, data collection comprised FGDs with policy,  
430 health management and household members in the community, excluding interviews within  
431 individual households. Future research may want to explore how intra-household dynamics impact on  
432 the nutritional status of women.

433

#### 434 **Acknowledgements**

435 We would like to thank the participants and fieldworkers who gave their time to this study, and  
436 without whom this research would not have been possible.

437

## 438 References

- 439 1. World Health Organisation. Malnutrition Factsheet. Geneva: World Health Organisation;  
440 2020.
- 441 2. UNICEF, WHO, World Bank Group. Levels and Trends in Child Malnutrition: UNICEF / WHO /  
442 World Bank Group Joint Child Malnutrition Estimates. Key Findings of the 2018 Edition. New York:  
443 United Nations Children's Fund (UNICEF); 2018.
- 444 3. UNICEF. Nutrition, Malnutrition: Current Status and Progress. Geneva: United Nations  
445 Children's Fund (UNICEF); 2018.
- 446 4. Dewey KG, Begum K. Long-term consequences of stunting in early life. *Maternal & Child*  
447 *Nutrition*. 2011;7(s3):5-18.
- 448 5. Aheto JMK, Keegan TJ, Taylor BM, Diggle PJ. Childhood Malnutrition and Its Determinants  
449 among Under-Five Children in Ghana. *Paediatric and Perinatal Epidemiology*. 2015;29(6):552-61.
- 450 6. de Onis M, Dewey KG, Borghi E, Onyango AW, Blössner M, Daelmans B, et al. The World Health  
451 Organization's global target for reducing childhood stunting by 2025: rationale and proposed actions.  
452 *Matern Child Nutr*. 2013;9 Suppl 2(Suppl 2):6-26.
- 453 7. Bloem M, Pee Sd. Scaling up nutrition: a framework for action. *Food Nutr Bull*. 2010;31(1):178-  
454 86.
- 455 8. Sullivan LM, Sakayan M, Cernak K. 1,000 Days: Mobilizing Investments for Healthier, More  
456 Prosperous Futures. *ZERO TO THREE*. 2018;38(4):31-6.
- 457 9. Kominarek MA, Rajan P. Nutrition Recommendations in Pregnancy and Lactation. *Med Clin*  
458 *North Am*. 2016;100(6):1199-215.
- 459 10. Gupta A, Suri S, Dadhich J, Trejos M, Nalubanga B. The world breastfeeding trends initiative:  
460 implementation of the global strategy for infant and young child feeding in 84 countries. *Journal of*  
461 *public health policy*. 2019;40(1):35-65.
- 462 11. Sankar MJ, Sinha B, Chowdhury R, Bhandari N, Taneja S, Martines J, et al. Optimal  
463 breastfeeding practices and infant and child mortality: a systematic review and meta-analysis. *Acta*  
464 *paediatrica*. 2015;104:3-13.
- 465 12. Cumming O, Cairncross S. Can water, sanitation and hygiene help eliminate stunting? Current  
466 evidence and policy implications. *Maternal & Child Nutrition*. 2016;12(S1):91-105.
- 467 13. Tickell KD, Pavlinac PB, John-Stewart GC, Denno DM, Richardson BA, Naulikha JM, et al. Impact  
468 of Childhood Nutritional Status on Pathogen Prevalence and Severity of Acute Diarrhea. *Am J Trop*  
469 *Med Hyg*. 2017;97(5):1337-44.
- 470 14. Alemayehu M, Tinsae F, Hailesslassie K, Seid O, Gebregziabher G, Yebyo H. Undernutrition  
471 status and associated factors in under-5 children, in Tigray, Northern Ethiopia. *Nutrition*. 2015;31(7-  
472 8):964-70.
- 473 15. Reinhardt K, Fanzo J. Addressing Chronic Malnutrition through Multi-Sectoral, Sustainable  
474 Approaches: A Review of the Causes and Consequences. *Front Nutr*. 2014;1:13.
- 475 16. UNICEF. UNICEF Conceptual Framework for Malnutrition. 2008.
- 476 17. World Health Organisation. UNICEF Conceptual Framework on Maternal and Child Nutrition.  
477 New York: World Health Organisation; 2021.
- 478 18. World Health Organisation. Gender [Internet]. Available from: : [https://www.who.int/health-](https://www.who.int/health-topics/gender)  
479 [topics/gender](https://www.who.int/health-topics/gender); 2022.
- 480 19. Holmes AV, Chin NP, Kaczorowski J, Howard CR. A barrier to exclusive breastfeeding for WIC  
481 enrollees: limited use of exclusive breastfeeding food package for mothers. *Breastfeeding Medicine*.  
482 2009;4(1):25-30.
- 483 20. Jesson J, Coulibaly A, Sylla M, N'Diaye C, Dicko F, Masson D, et al. Evaluation of a Nutritional  
484 Support Intervention in Malnourished HIV-Infected Children in Bamako, Mali. *JAIDS Journal of*  
485 *Acquired Immune Deficiency Syndromes*. 2017;76:14Y 157.

- 486 21. Morgan R, Tetui M, Muhumuza Kananura R, Ekirapa-Kiracho E, George AS. Gender dynamics  
487 affecting maternal health and health care access and use in Uganda. *Health Policy and Planning*.  
488 2017;32(suppl\_5):v13-v21.
- 489 22. Morgan R, George A, Ssali S, Hawkins K, Molyneux S, Theobald S. How to do (or not to do)...  
490 gender analysis in health systems research. *Health Policy Plan*. 2016;31(8):1069-78.
- 491 23. Jhpiego. *Gender Analysis Toolkit for Health Systems*. Baltimore: Jhpiego; 2016.
- 492 24. Warren H. Using gender-analysis frameworks: theoretical and practical reflections. *Gender &*  
493 *Development*. 2007;15(2):187-98.
- 494 25. World Health Organisation. *Taking sex and gender into account in emerging infectious*  
495 *diseases programmes: An analytical framework*. Geneva: World Health Organisation; 2011.
- 496 26. World Health Organisation. *Incorporating Intersectional Gender Analysis into Research on*  
497 *Infectious Diseases of Poverty: A Toolkit for Health Researchers*. Geneva: World Health Organisation;  
498 2020.
- 499 27. World Bank. *World Development Indicators*. 2019.
- 500 28. Government of Malawi. *National Multi-Sector Nutrition Policy 2018 - 2022*. Lilongwe:  
501 Government of Malawi; 2018.
- 502 29. Government of Malawi National Statistical Office. *Malawi Demographic and Health Survey*.  
503 Zomba: Malawi National Statistical Office; 2017.
- 504 30. Committee GoMVA. *The Integrated Food Security Phase Classification (IPC) in Malawi:*  
505 *Findings of the 2017 Assessment and Analysis*. Lilongwe: Government of Malawi; 2017.
- 506 31. World Food Programme. *Household Food Security in Malawi: Results from a Comprehensive*  
507 *Food Security Survey Malawi: World Food Programme; 2018*.
- 508 32. World Bank. *What is Food Security? 2022* [Available from:  
509 <https://www.worldbank.org/en/topic/agriculture/brief/food-security-update/what-is-food-security>].
- 510 33. Dressel A, Mkandawire E, Gondwe KW, Mkandawire-Valhmu L, Nordin S, Vilakazi N, et al. The  
511 intersection of food insecurity and health for rural Malawian women at the end of life. *International*  
512 *Journal of Palliative Nursing*. 2020;26(7):372-82.
- 513 34. Government of Malawi, Policy AlFD. *Child Marriage in Malawi Factsheet*. Lilongwe:  
514 Government of Malawi Ministry of Gender, Children, Disability and Social Welfare; 2017.
- 515 35. O'Neil T, Kanyongolo N, Wales J, Walita Mkandawire M. *Women and Power: Representation*  
516 *and Influence in Malawi's Parliament*. London: Overseas Development Institute; 2016.
- 517 36. Lodenstein E, Pedersen K, Botha K, Broerse JEW, Dieleman M. Gendered norms of  
518 responsibility: reflections on accountability politics in maternal health care in Malawi. *International*  
519 *Journal for Equity in Health*. 2018;17(1):131.
- 520 37. Stewart DW, Shamdasani PN. *Focus Groups: Theory and Practice*. California: SAGE; 2015.
- 521 38. Hennink M, Hutter I, Bailey A. *Qualitative Research Methods*. 2nd Edition ed. London: SAGE  
522 Publications Ltd.; 2020.
- 523 39. Braun V, Clarke V. Using thematic analysis in psychology. *Qualitative Research in Psychology*.  
524 2006;3(2):77-101.
- 525 40. Leung L. Validity, reliability, and generalizability in qualitative research. *Journal of family*  
526 *medicine and primary care*. 2015;4(3):324-7.
- 527 41. Kamiya Y, Nomura M, Ogino H, Yoshikawa K, Siengsounthone L, Xangsayarath P. Mothers'  
528 autonomy and childhood stunting: evidence from semi-urban communities in Lao PDR. *BMC Women's*  
529 *Health*. 2018;18(1):70.
- 530 42. Sibhatu KT, Qaim M. Rural food security, subsistence agriculture, and seasonality. *PloS one*.  
531 2017;12(10):e0186406.
- 532 43. Rankoana SA, editor *The Use of Indigenous Knowledge in Subsistence Farming: Implications*  
533 *for Sustainable Agricultural Production in Dikgale Community in Limpopo Province, South Africa*2017.
- 534 44. Mkandawire E, Bisai C, Dyke E, Dressel A, Kantayeni H, Molosoni B, et al. A qualitative  
535 assessment of gender roles in child nutrition in Central Malawi. *BMC Public Health*. 2022;22(1):1392.

- 536 45. Grundy E, Kravdal Ø. Do short birth intervals have long-term implications for parental health?  
537 Results from analyses of complete cohort Norwegian register data. *Journal of Epidemiology and*  
538 *Community Health*. 2014;68(10):958.
- 539 46. Hawkes C, Fanzo J. *Nourishing the SDGs: Global nutrition report 2017*. 2017.
- 540 47. Nations FaAOotU. *Integrating Agriculture and Nutrition Education for Improved Young Child*  
541 *Nutrition*. Rome: Food and Agriculture Organisation; 2016.
- 542 48. Malawi Go. *Nutrition Handbook for Farmer Field Schools*. Lilongwe: Ministry of Agriculture,  
543 Irrigation and Water Development; 2015.
- 544 49. Canavan CR, Graybill L, Fawzi W, Kinabo J. The SDGs Will Require Integrated Agriculture,  
545 Nutrition, and Health at the Community Level. *Food Nutr Bull*. 2016;37(1):112-5.
- 546 50. Mkandawire E, Hendriks SL. A qualitative analysis of men's involvement in maternal and child  
547 health as a policy intervention in rural Central Malawi. *BMC Pregnancy and Childbirth*. 2018;18(1):37.
- 548
- 549
- 550
- 551

|                                                                     |                                                                                     | <b>Domains of RinGS Framework for Gender Analysis</b>                                           | <b>Corresponding Theme</b>                                                                        | <b>Categories</b>                                     |
|---------------------------------------------------------------------|-------------------------------------------------------------------------------------|-------------------------------------------------------------------------------------------------|---------------------------------------------------------------------------------------------------|-------------------------------------------------------|
| <b>How gender norms affect stunting in Ntchisi district, Malawi</b> |    | <i>Division of labour, roles and everyday practices</i><br><br><i>Rules and decision making</i> | Gender unequal decision making on the consumption, sale and distribution of food                  | Distinction of roles in IYCF                          |
|                                                                     |                                                                                     |                                                                                                 |                                                                                                   | Competing spending needs                              |
|                                                                     |                                                                                     |                                                                                                 |                                                                                                   | Nutrition not a priority in household spending        |
|                                                                     |                                                                                     |                                                                                                 |                                                                                                   | Men control decisions on use of farm produce          |
|                                                                     |                                                                                     |                                                                                                 |                                                                                                   | Mothers at health centres, fathers at home            |
|                                                                     |    | <i>Social norms and values</i>                                                                  | Enshrined community norms influence feeding practices underpinned by <b>gender based violence</b> | Household conflict and gender based violence          |
|                                                                     |                                                                                     |                                                                                                 |                                                                                                   | Women accept GBV: fear and avoid shame                |
|                                                                     |                                                                                     |                                                                                                 |                                                                                                   | Prevalence of GBV after harvesting time               |
|                                                                     |                                                                                     |                                                                                                 |                                                                                                   | <b>Men's status in the community an enduring norm</b> |
|                                                                     |  | <i>Access to resources</i>                                                                      | Policy disconnections and gaps that reinforce unequal gender norms at the structural level        | Agriculture, nutrition interventions disconnected     |
|                                                                     |                                                                                     |                                                                                                 |                                                                                                   | Poor male involvement in nutrition interventions      |
|                                                                     |                                                                                     |                                                                                                 |                                                                                                   | Teen motherhood and large family sizes                |
|                                                                     |                                                                                     |                                                                                                 |                                                                                                   | Low education and literacy levels                     |

medRxiv preprint doi: <https://doi.org/10.1101/2023.08.04.23293655>; this version posted August 8, 2023. The copyright holder for this preprint (which was not certified by peer review) is the author/funder, who has granted medRxiv a license to display the preprint in perpetuity. It is made available under a [CC-BY 4.0 International license](https://creativecommons.org/licenses/by/4.0/).

Figure 2



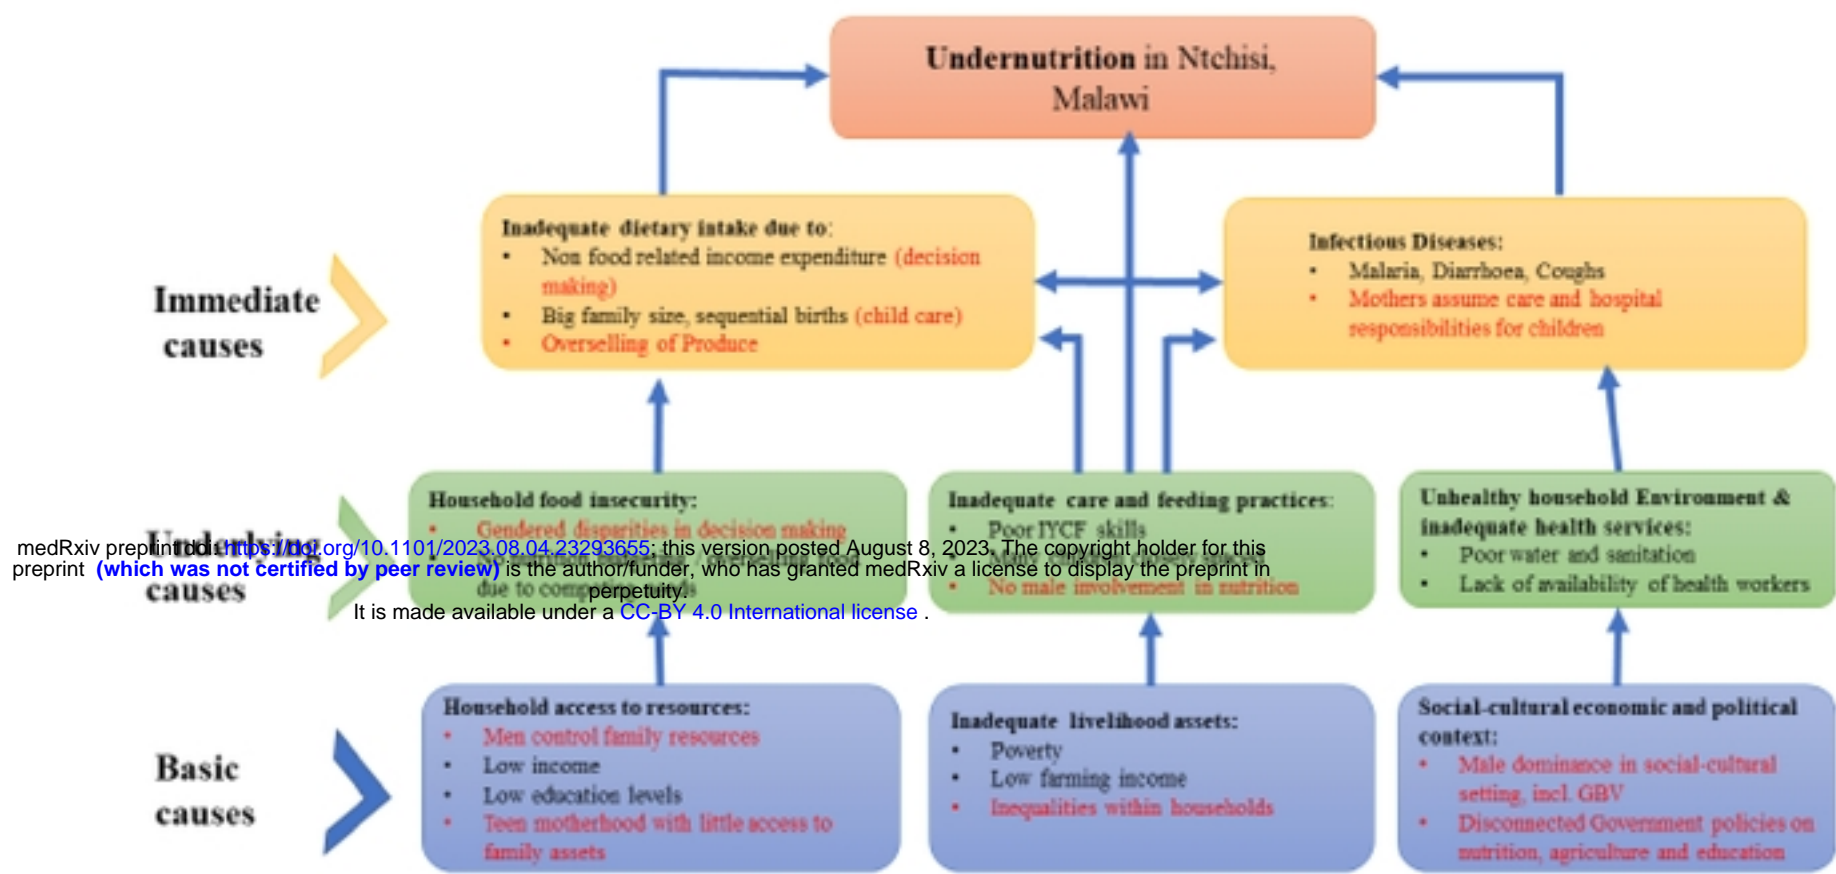

Figure 3



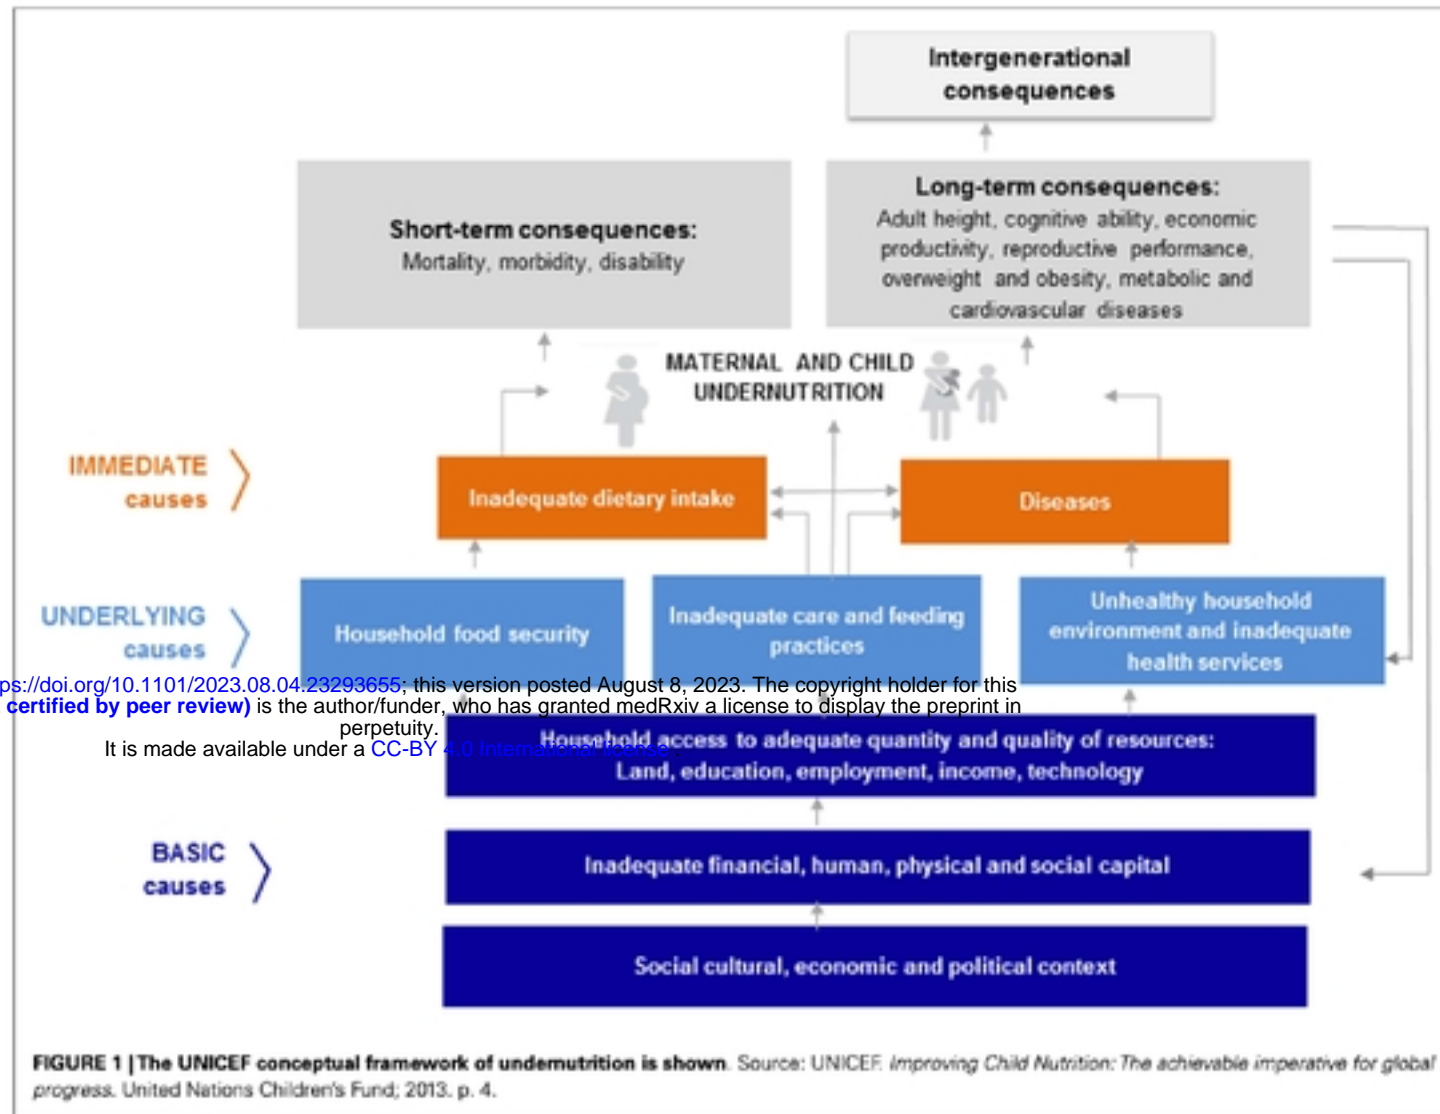

**Source:** Reinhardt K, Fanzo J. Addressing Chronic Malnutrition through Multi-Sectoral, Sustainable Approaches: A Review of the Causes and Consequences. *Front Nutr.* 2014;1:13.
